# Supplementary material for: Emergence and spread of Japanese encephalitis virus genotype IV in a novel ecosystem: Australia, 2021-2022
Source: Research Square preprint supplement (doi:10.21203/rs.3.rs-7046873/v1), 2025-07-28
Supplement: Supplementary file 1 [file 9de810c2d3fc01f8005d7d6a.docx]

**Emergence and spread of Japanese encephalitis virus genotype IV in a novel ecosystem**


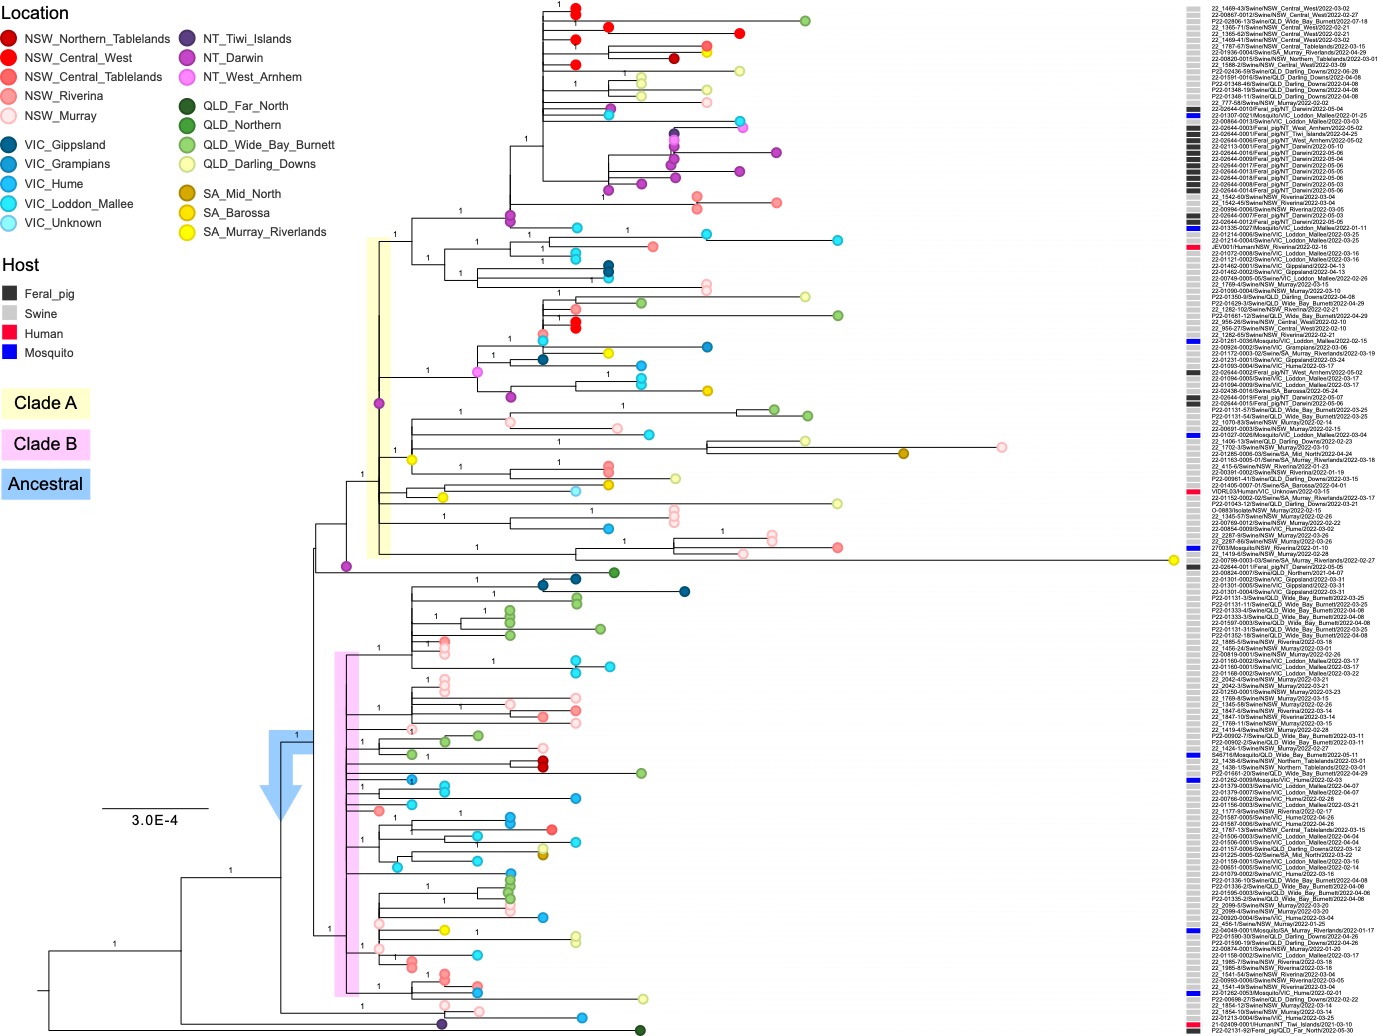


**Supplementary Figure 1 – Maximum likelihood genome phylogeny of GIV Australia 2021-22 lineage**. Full length genomes from the Australian JEV GIV outbreak were aligned before a phylogenetic tree was estimated using PhyML. The phylogeny was rooted using the Indonesian strain JEV/Swine/Bali-93/2017 (GenBank accession number LC461961). Colored circles at tips indicate the sampling location with colored boxes next to sequence labels show host species as per the legends provided. The two major clades A & B have been highlighted, as well as the putative ancestral group that sit in basal positions. The scale bar is proportional to the number of substitutions per site. Shimodaira–Hasegawa approximate likelihood-based measures of branch support are provided at nodes.


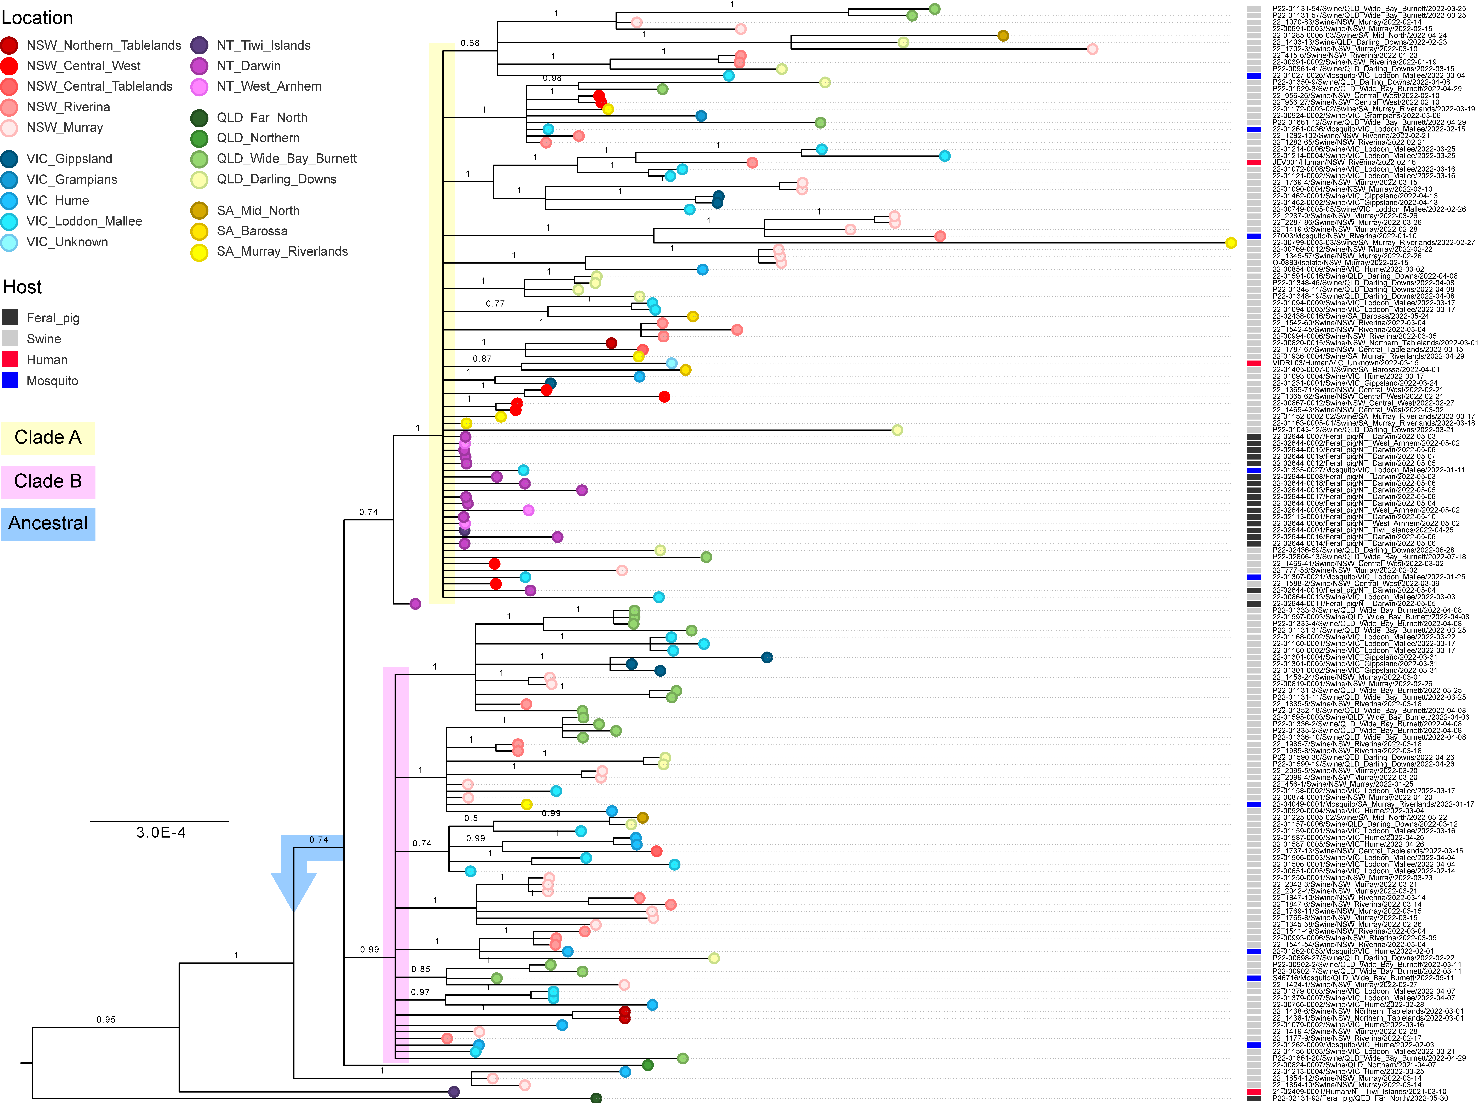


**Supplementary Figure 2 – Bayesian genome phylogeny of GIV Australia 2021-22 lineage**. Full length genomes from the Australian JEV GIV outbreak were aligned before a phylogenetic tree was estimated using MrBayes. The phylogeny was rooted using the Indonesian strain JEV/Swine/Bali-93/2017 (GenBank accession number LC461961). Colored circles at tips indicate the sampling location with colored boxes next to sequence labels show host species as per the legends provided. The two major clades A & B have been highlighted, as well as the putative ancestral group that sit in basal positions. The scale bar is proportional to the number of substitutions per site. Posterior probability branch support values are provided at nodes.

**Supplementary Figure 3 – Unrooted maximum likelihood genome phylogeny of GIV Australia 2021-22 lineage showing informative sites**. The same data and phylogeny from Supp Figure 1, displayed unrooted to demonstrate the star-like pattern and three main informative sites at positions 539, 5537 & 7241 (relative to GenBank accession number LC461961) that largely define the backbone of the phylogeny. The base composition of each clade and other intermediate variants are shown in the key provided and with colored tip circles. The scale bar is proportional to the number of substitutions per site.


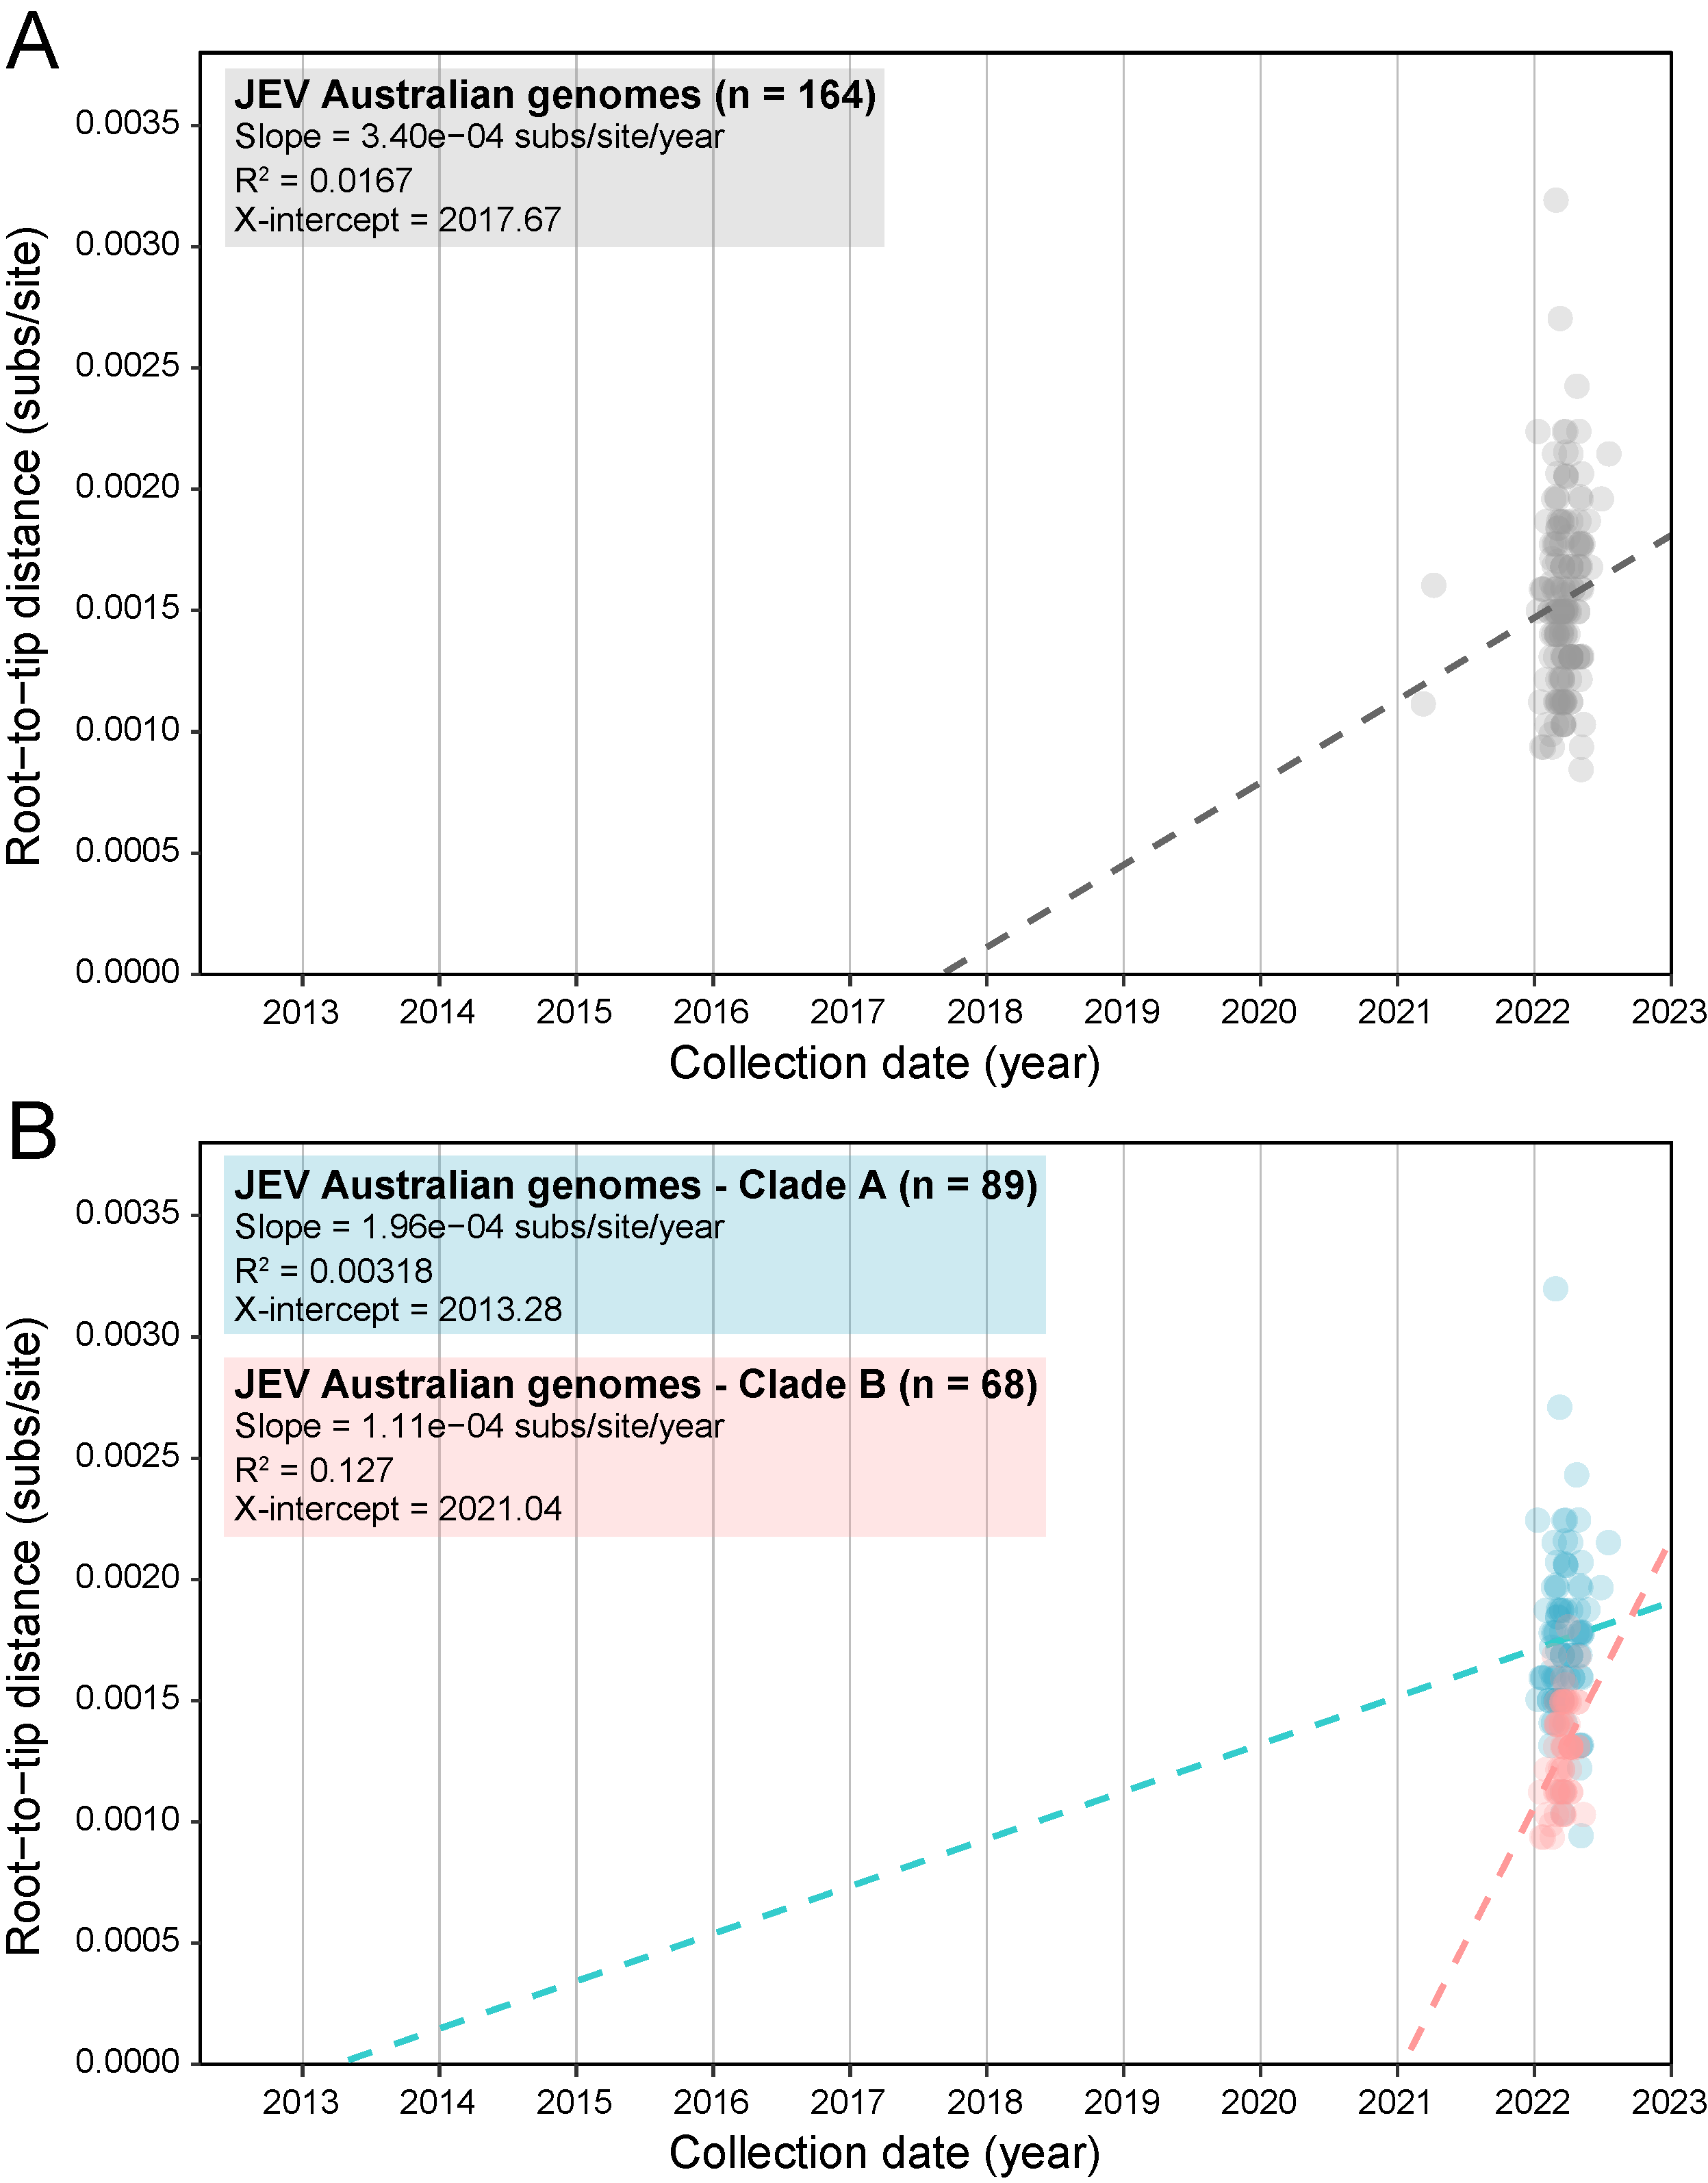


**Supplementary Figure 4 – Lack of temporal structure in JEV GIV Australia 2021-22 outbreak.** Linear regression of root-to-tip genetic distance on the maximum likelihood genome phylogeny of GIV Australia 2021-22 lineage viruses against time of sampling. (a) All JEV GIV genomes from the Australian outbreak (b) same JEV genomes partitioned into individual clades A (blue) and B (red).


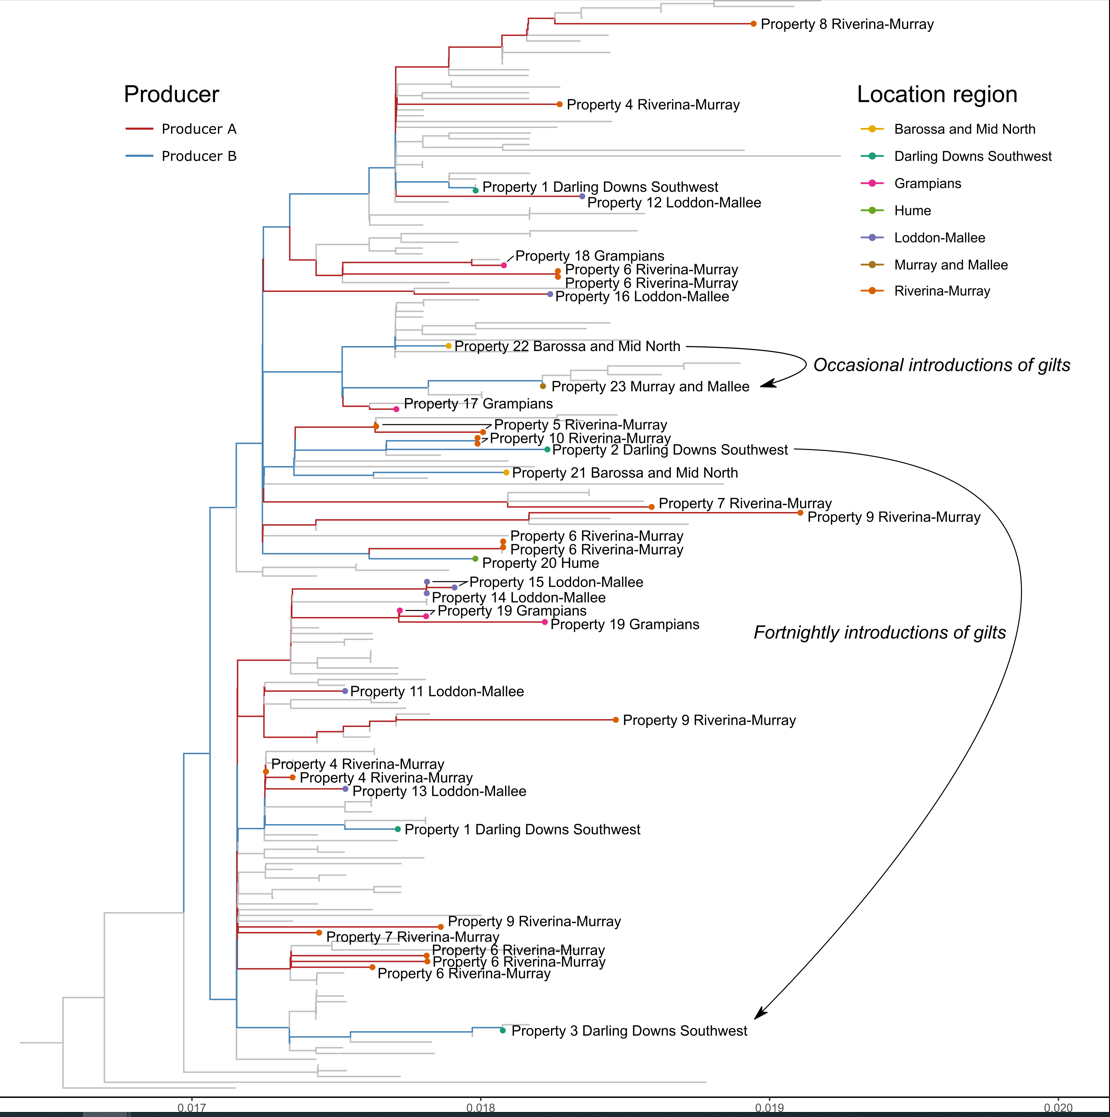


**Supplementary Figure 5** – **JEV belonging to both virus clades were detected within individual porcine production units from Queensland, New South Wales, South Australia and Victoria**. An alignment of full-length genomes from Australian GIV outbreak viruses were used to generate a phylogenetic tree estimated using IQ-TREE. The phylogeny was rooted using the Indonesian strain JEV/Swine/Bali-93/2017 (GenBank Acc. No. LC461961). Colored branches indicate samples that came from different porcine producers and arrows at the tips indicate known movements of animals

.

**Supplementary Table 1 – Collection details of mosquito samples yielding positive JEV detections.** Morphological identification ofmosquito samples was undertaken prior to homogenisation, JEV RT-qPCR screening and whole genome sequencing.

| **Sample identification number** | **Region or nearest town** | **Date of collection** | **Grouped location** | **Number of mosquitoes in pool tested** | **Mosquito species composition** |
| --- | --- | --- | --- | --- | --- |
| 27003 | Wagga Wagga | 10/01/2022 | NSW_Riverina | 282 | 198 *Culex annulirostris*  50 *Aedes notoscriptus*  27 *Cx. australicus*  4 *Cx. quinquefasciatus*  2 *Anopheles annulipes*  1 *Ae. alboannulatus* |
| 27075 | Forbes | 17/01/2022 | NSW_Central_West | 8,248 | 5594 *Ae. theobaldi*  1900 *Cx. annulirostris*  392 *Ae. vittiger*  196 *Ae. alternans*  75 *Cx. australicus*  45 *Ae. sagax*  45 *An. annulipes* |
| 27163 | Forbes | 24/01/2022 | NSW_Central_West | 2,121 | 1340 *Cx. annulirostris*  658 *Ae. theobaldi*  99 *Ae. vittiger*  8 *Ae. alternans*  8 *Cx. australicus*  8 *Tripteroides*atripes |
| 22-01027-0026 | Gannawarra | 4/03/2022 | VIC_Loddon_Mallee | 195 | 168 *Cx. annulirostris*  10 *Cx. australicus*  6 *Mansonia uniformis*  5 *Cx. molestus*  2 *An. annulipes*  2 *Coquillettidia linealis*  2 *Cx. cylindricus* |
| 22-01261-0036 | Mildura | 15/02/2022 | VIC_Loddon_Mallee | 842 | 820 *Cx. annulirostris*  9 *An. annulipes*  4 *Cx. australicus*  4 *Ae. theobaldi*  3 *Cx. quinquefasciatus*  1 *Ae. notoscriptus*  1 *Ae. vittiger* |
| 22-01262-0009 | Wodonga | 3/02/2022 | VIC_Hume | 317 | 212 *Cx. annulirostris*  84 *Ae. notoscriptus*  8 *Cx. australicus*  4 *An. annulipes*  4 *Ae. bancroftianus*  4 *Cx. cylindricus*  1 *Ae. alternans* |
| 22-01262-0053 | Moira | 1/02/2022 | VIC_Hume | 182 | 171 *Cx. annulirostris*  6 *Cx. australicus*  3 *Cx. quinquefasciatus*  1 *An. annulipes*  1 *Ae. notoscriptus* |
| 22-01307-0021 | Campaspe | 25/01/2022 | VIC_Loddon_Mallee | 107 | 76 *Cx. annulirostris*  15 *Cx. quinquefasciatus*  6 *Cx. australicus*  3 *Cx. molestus*  2 *Ae. notoscriptus*  2 *Ae. sagax*  1 *Ae. theobaldi*  1 *Ae. vittiger*  1 *An. annulipes* |
| 22-01335-0027 | Campaspe | 11/01/2022 | VIC_Loddon_Mallee | 186 | 162 *Cx. annulirostris*  16 *An. annulipes*  6 *Cx. australicus*  1 *Ae. theobaldi*  1 *Cq. linealis* |
| 22-01335-0070 | Shepparton | 30/12/2021 | VIC_Hume | 271 | 216 *Cx. annulirostris*  21 *An. annulipes*  15 *Ae. theobaldi*  9 *Ae. notoscriptus*  9 *Cx. australicus*  1 *Ae. vittiger* |
| S46716 | Mundubbera | 15/3/2022 | QLD_Wide_Bay_Burnett | 50 | 373 *Ae. vittiger*a  2 *An. annulipes*  2 *An. bancrofti*  28 *Cx. annulirostris*  3 *Cx. gelidus*  5 *Cq. xanthogaster* |
| 22-04049-0001/27080 | Swan Reach | 17/01/2022 | SA_Murray_Riverlands | 8 | 3 *Ae. camptorhynchus*  1 *Cq. linealis*  4 *Cx. annulirostris* |

aThe number of mosquitoes of each species presented here is for an entire trap collection of 418 mosquitoes from which 9 pools were processed. The pool which yielded the sequence was a pool of 50 mosquitoes from this trap and is comprised of mixed species, which may have contained some or all the species listed (Pyke *et al.,* 2024).

**Supplementary Table 2.** Details of infected commercial piggeries included in an analysis of the potential role of pig movements in the 2022 outbreak in south-eastern Australia.

| **De-identified infected property No.** | **Location state** | **Location region** | **Clade** | **No. of sequences from property** | **Notes on operations** |
| --- | --- | --- | --- | --- | --- |
| 1 | Queensland | Darling Downs Southwest | A, B | 1 | Semi-closed to live introductions. Gilts leave the site to an acclimatisation facility and return, all on the same property. Semen 2x weekly from non-infected property#. |
| 2 | A | 1 | Has 5-weekly introductions of gilts from a non-infected property. Semen 2x weekly from non-infected property#. |
| 3 | B | 1 | Fortnightly introductions of gilts from property #2. Semen 2x weekly from non-infected property#. |
| 4 | New South Wales | Riverina-Murray | A, B | 3 | Multi-unit farm. Closed since week 51, 2021 when had intakes of gilts from piggeries in Loddon-Mallee and Grampians. Semen daily from property concurrently confirmed infected. |
| 5 | A | 2 |
| 6 | A, B | 5 |
| 7 | A, B | 2 | Closed farm. Semen 2-3x weekly from property concurrently confirmed infected. |
| 8 |  | A | 1 | Closed farm. Semen daily from property concurrently confirmed infected. |
| 9 | A, B | 3 | Semi-closed to live animals and self-replaces. Sends replacement gilts to grow out at a separate property. Semen 2-3x weekly from property concurrently confirmed infected. |
| 10 | A | 1 | Closed farm. No external semen. |
| 11 | Victoria | Loddon-Mallee | B | 1 | Closed farm. Semen 2-3x weekly from property concurrently confirmed infected. |
| 12 | A | 1 | Closed farm. Semen 2-3x weekly from property concurrently confirmed infected. |
| 13 | B | 1 | Closed farm. Semen 2-3x weekly from property concurrently confirmed infected. |
| 14 | B | 1 | Closed farm. Semen 2-3x weekly from property concurrently confirmed infected. |
| 15 | B | 2 | Closed farm. Semen 2-3x weekly from property concurrently confirmed infected. |
| 16 | A | 1 | Boar stud |
| 17 | Grampians | A | 1 | Multi-unit farm. Semi-closed to live animals and self-replaces. Sends replacement gilts to grow out at a separate property. Semen 2-3x weekly from property concurrently confirmed infected. |
| 18 | A | 2 |
| 19 | B | 3 |
| 20 | Hume | A | 1 | Fortnightly introduction of gilts from separate non-infected property. Semen 2x weekly from non-infected property*. |
| 21 | South Australia | Barossa and Mid North | A | 1 | Closed farm. Semen 2x weekly from non-infected property*. |
| 22 | A | 1 | Fortnightly introduction of gilts from separate non-infected property. Semen 2x weekly from non-infected property*. |
| 23 | Murray and Mallee | A | 1 | Occasional introduction of gilts from property #22 and a non-infected property. Semen 2x weekly from non-infected property*. |

# Non-infected property supplying semen also supplied semen to properties that were infected.

* Non-infected property supplying semen different to property supplying 1, 2 and 3, and property also supplied semen to properties that were infected.

**Supplementary Table 3. Details of primers used for whole genome sequencing at the Biosecurity Sciences Laboratory, Queensland Government.**

| **Name** | **Pool** | **Sequence (5’ 🡪 3’)** |
| --- | --- | --- |
| JEV_1F | 1 | TTAGTATTGTTGAGGAGAATCGAGAGA |
| JEV_1R | TGTTCCTCCATTTCCTCCTCTTT |
| JEV_3F | TGGCAATGACCCAGAGGATGT |
| JEV_3R | CTCCTTCTAGCACCAAGTCCAC |
| JEV_5F | GGATGTGGACTTTTTGGAAAAGGA |
| JEV_5R | TCTCTGTTTCTCCATGCAGTGT |
| JEV_7F | GTTTGCAAAGAATCCAGCGGAC |
| JEV_7R | GAACGGCCTTCCCAATGGAA |
| JEV_9F | CATCTTTGTGCACAACGACGTG |
| JEV_9R | TTGCATGCTATTCCAGGCTCTG |
| JEV_11F | CAGAAACACACACTCTCTGGGG |
| JEV_11R | GGGTCAATCATCTCACCACTGA |
| JEV_13F | CAAAATTCAGCCGGCATTCCTG |
| JEV_13R | TGTGGTAGGTGAAAACCAACCA |
| JEV_15F | GATATCAGCTGGGAGATGGACG |
| JEV_15R | CACTCATTATTGCGGCCCCT |
| JEV_17F | TGGCTCACCCATCCTGGATT |
| JEV_17R | CATCAGTCTGTGGGTCAAGGTG |
| JEV_19F | AATGGATCACAGAGTACGCAGG |
| JEV_19R | TGCTATCATCTTCACTGGTGGC |
| JEV_21F | GACAGAAAGTGGTGCTTTGACG |
| JEV_21R | CGTTGCATCATGAGCAGAAAGA |
| JEV_23F | CAGCGAATGAGTACGGGATGTT |
| JEV_23R | CTTAGTGCCTCAGCTTGCCATC |
| JEV_25F | ACCCTATGGGATAATGGAGCCA |
| JEV_25R | TCCACGTCCACATCCTAGGT |
| JEV_27F | GAAGAACAACGAACCCTGCGAG |
| JEV_27R | ATGTCGTGGCGAATTCCTCTTT |
| JEV_29F | AAGGAAGTGCTCAACGAAACCA |
| JEV_29R | ACCTGAGTTCCTCCGGCTTA |
| JEV_31F | AAAGTCATGAGGCCCTCGACAG |
| JEV_31R | CCTGGAAATGGTTAGAGCAAAAAGG |
| JEV_33F | CCACAGGCAGAACATCTTGGTC |
| JEV_33R | TGGCCTGACTCCATATGTACAC |
| JEV_2F | 2 | TAGCTTCAAACGGGAACTTGGG |
| JEV_2R | GAGTGTCTGGTTCTTGTGCACC |
| JEV_4F | TCCGGCATACAGTTTCAATTGC |
| JEV_4R | TTTCTGGCTGAATCGTCTTCCC |
| JEV_6F | TGGGCTCAAAGTCATTCTTGGT |
| JEV_6R | GGCCACTGAGACAATTGGGATT |
| JEV_8F | GATTGGCAGCGTTGGGAGATAC |
| JEV_8R | GCGCTTTGTGGACAATTTTTGC |
| JEV_10F | TTTTTGCTCCAGAGTTGGCCAA |
| JEV_10R | CCTGTTGTGTTTGCTTTTGGGT |
| JEV_12F | GCTGCTGGTATGGAATGGAAGT |
| JEV_12R | TGCTCCGAGAACCAGAACTACA |
| JEV_14F | CTGTTGCAGGAGAGAAGGAGGA |
| JEV_14R | GAAGTCTCCATCATCGTCCAGC |
| JEV_16F | AAGCCGGTGTTGGAGTCATGTA |
| JEV_16R | CACGATGGCGCTGACATATGA |
| JEV_18F | CAAACTTCAGCAGTGCAAAGGG |
| JEV_18R | CTCTCTGGAGGCAAACAGCAAT |
| JEV_20F | GAGAGGTAGGGTGGGTAGGAAT |
| JEV_20R | TCCTCTCACCCATTCTTGTGAC |
| JEV_22F | TACCAGACGCATTGGAGACCAT |
| JEV_22R | AGGCAGTCCAGTCATTCCTGA |
| JEV_24F | ATCACTCTCACGACCTTCCTGA |
| JEV_24R | CCAGCCAAGTAACTGCCTCTCA |
| JEV_26F | GTTTCGCGAGGTTCAGCAAAAC |
| JEV_26R | CATGTAAGGGCAGAGCACCTTT |
| JEV_28F | TAGGGAAGGGAGAAGTCCACAG |
| JEV_28R | AACTCTTCCTTCGTGCACAAGC |
| JEV_30F | TTTGGTTCATGTGGCTAGGAGC |
| JEV_30R | AGAGCATAGGTGACCACTTGC |
| JEV_32F | CGAAGGTCAGGAAAGACATCCA |
| JEV_32R | CTCTGTTCCAAACCTGCAGCAT |
| JEV_34F | ACGAGGATGTCTTGATCCAGGA |
| JEV_34R | AGTCCTTACATCTCGTCCATTGC |

**Supplementary Table 4. Details of primers used for whole genome sequencing at the Westmead Institute for Medical Research.** Primer sets of JEV-SW-500 and JEV-G4-800 for whole genome sequencing are shown.

| **Name** | **Pool** | **Sequence (5' 🡪 3')** |
| --- | --- | --- |
| JEV-SW-500_1_LEFT | 1 | TGACTTAGTATTGTTGAGGAGAATCGA |
| JEV-SW-500_1_RIGHT | TCCGCAATGTCCGTATTGTTGA |
| JEV-SW-500_3_LEFT | CGGTATCTCATGAAAACTGAAAATTGG |
| JEV-SW-500_3_RIGHT | TGCTAGTGCAGGAGAACTTAGC |
| JEV-SW-500_5_LEFT | GACGTCCTCTTCAAACACTGCA |
| JEV-SW-500_5_RIGHT | TTGTGCCAATGGTGGTTGATCT |
| JEV-SW-500_7_LEFT | CGCTGATACTGGCTGTGCTATT |
| JEV-SW-500_7_RIGHT | ATCTTTAACCACACCCGGGTTG |
| JEV-SW-500_9_LEFT | CGAAGATGGCATCGTCTTAGACT |
| JEV-SW-500_9_RIGHT | CAGGAATGCCGGCTGAATTTTG |
| JEV-SW-500_11_LEFT | CGAAAAAGAAAGGAGCCGTGCT |
| JEV-SW-500_11_RIGHT | GTCCCAAAACACACCTCCTCTT |
| JEV-SW-500_13_LEFT | GACGAAGCCGGGAGTGTTTT |
| JEV-SW-500_13_RIGHT | CCTGTTCGGTGACATCAGTCTG |
| JEV-SW-500_15_LEFT | GGGGAAAAGGGTCATTCAGCTC |
| JEV-SW-500_15_RIGHT | TCAGCAGTCCTAAGCAGCTCTA |
| JEV-SW-500_17_LEFT | CAATGTACCTGGTCGCTACAGC |
| JEV-SW-500_17_RIGHT | CTACCTCCATACAATGCCCAGG |
| JEV-SW-500_19_LEFT | ACCGATGTGCCTGAATTGGAAA |
| JEV-SW-500_19_RIGHT | CGAATCCTTTTTCCACGAGCCA |
| JEV-SW-500_21_LEFT | CTTCTGACTGGTTGCACAGAGG |
| JEV-SW-500_21_RIGHT | CATCCCAGGGCTTGCTCATTAG |
| JEV-SW-500_23_LEFT | GACGTGGAGAGGGAAAACCATC |
| JEV-SW-500_23_RIGHT | TGCCTCTCTGGTCTTCTCTTGA |
| JEV-SW-500_25_LEFT | TTGGCAGCAAGTTCCTTTTTGC |
| JEV-SW-500_25_RIGHT | GCTCTCACCTGATTTATTGCTGCA |
| JEV-SW-500_27_LEFT | AGGAGGACTGGGTTAACAAATCTG |
| JEV-SW-500_27_RIGHT | CACATACTTCGGCGCTCTGT |
| JEV-SW-500_2_LEFT | 2 | GCTTGACAATTGCTGCAGTCAG |
| JEV-SW-500_2_RIGHT | CATGCGCTGGCCACTATTACT |
| JEV-SW-500_4_LEFT | ATGTTTGCAAGCAAGGCTTCAC |
| JEV-SW-500_4_RIGHT | TTCTTGTGACCCGAGGGCAA |
| JEV-SW-500_6_LEFT | GTCTTGGTTGAGATGGAACCCC |
| JEV-SW-500_6_RIGHT | TACCTATCCACCCAAGCTTCCA |
| JEV-SW-500_8_LEFT | AAAGAATGCCCCGATGAACACA |
| JEV-SW-500_8_RIGHT | TCAGTGGTGGTTCTGACTGAGG |
| JEV-SW-500_10_LEFT | GCCGCTTTTGCAGAAGCTAAT |
| JEV-SW-500_10_RIGHT | CTTCTTGTTTGGGTTGCAGACC |
| JEV-SW-500_12_LEFT | CATGTCTTGCATTGGCCTAGC |
| JEV-SW-500_12_RIGHT | AGGATGGGTGAGCCAGATGTTC |
| JEV-SW-500_14_LEFT | CAAACTTCAGCAGTGCAAAGGG |
| JEV-SW-500_14_RIGHT | GATGACAAAGTCCCAGTCTCCG |
| JEV-SW-500_16_LEFT | ACCTGAGAGGGAAAAGGCTTTC |
| JEV-SW-500_16_RIGHT | GCGATGGCTACAATGAGTGTGA |
| JEV-SW-500_18_LEFT | AAAAGCATGTTTGGCGGGAAAG |
| JEV-SW-500_18_RIGHT | AGGAATGCTGCCACACTAACTC |
| JEV-SW-500_20_LEFT | AGGGAAGCCATAACCGAGGT |
| JEV-SW-500_20_RIGHT | CTGCAGCACTTCCATCTTCTCT |
| JEV-SW-500_22_LEFT | CCGTATCGCACTTGGACATACC |
| JEV-SW-500_22_RIGHT | GCTTTTCCGAACTCTCCAGGTT |
| JEV-SW-500_24_LEFT | ACATACAAACACAAAGTAGTCAAAGTCA |
| JEV-SW-500_24_RIGHT | ATTAGCTCATCCTGGCCCCTAC |
| JEV-SW-500_26_LEFT | CGTGGGAAAACGTGAGGACATT |
| JEV-SW-500_26_RIGHT | ATCCTAGACGAGACTTGGGCTG |

| NAME | POOL | SEQUENCE (5' - 3') |
| --- | --- | --- |
| JEV-G4-800_1_LEFT | 1 | TTAGTATTGTTGAGGAGAATCGAGAGA |
| JEV-G4-800_1_RIGHT_alt | TTTTCATRAGATACCGGGTGGC |
| JEV-G4-800_3_LEFT | CGGAACCACGACCTCAGAAAAT |
| JEV-G4-800_3_RIGHT | CCCAATGTGCTTCCAGGTTTGT |
| JEV-G4-800_5_LEFT | GCGTAGTAGTCAACAAGCCTGT |
| JEV-G4-800_5_RIGHT_alt | CATCTCACCACTGAARGCATCG |
| JEV-G4-800_7_LEFT | CCATGGCGAAAAAGAAAGGAGC |
| JEV-G4-800_7_RIGHT_alt | CTTTCCTGGTTCCACYACGATC |
| JEV-G4-800_9_LEFT | GCGGGGTTACATTGCAACAAAA |
| JEV-G4-800_9_RIGHT | CGTCAAAGCACCACTTTCTGTC |
| JEV-G4-800_11_LEFT | TCATCTGTGTCCTGACTGTGGT |
| JEV-G4-800_11_RIGHT_alt | CCCCCAGGYCTTCCTCTCTTTA |
| JEV-G4-800_13_LEFT_alt | CATAAAGGTGCTCTGCCCYTAC |
| JEV-G4-800_13_RIGHT_alt | ATTCTCCTCGCAGRTGGTTTTC |
| JEV-G4-800_15_LEFT_alt | ACATGTGGAACAATTGCCTAGG |
| JEV-G4-800_15_RIGHT | TGACCCTGTCTTCCTGGATCAA |
| JEV-G4-800_2_LEFT_alt | 2 | AGAGAAGYAGGAGATCCGTGTC |
| JEV-G4-800_2_RIGHT | TCGCCAAGCTTCAGGGTTATTG |
| JEV-G4-800_4_LEFT | AGGTCTTGGTTGAGATGGAACC |
| JEV-G4-800_4_RIGHT | TTGGCCAACTCTGGAGCAAAAA |
| JEV-G4-800_6_LEFT | ACAGGAAGTGGCTGCTGGTAT |
| JEV-G4-800_6_RIGHT | TAGCAGGCCATCCTCTCTTCTT |
| JEV-G4-800_8_LEFT | TGACTCCATACTGGGGAAGTGT |
| JEV-G4-800_8_RIGHT_alt | TGGAGCGTTTGAGTCAGGRAAG |
| JEV-G4-800_10_LEFT | TCAGAGGTGAGGAGAAAAAGAATTTC |
| JEV-G4-800_10_RIGHT_alt | CATGCCAGGCARTCCAGTCATT |
| JEV-G4-800_12_LEFT | GCTCTGCCATGTTATGAGAGGC |
| JEV-G4-800_12_RIGHT | CATTACCAGCTGCTCCGCTAAC |
| JEV-G4-800_14_LEFT_alt | GAAAGTCAATAGYAACGCGGC |
| JEV-G4-800_14_RIGHT | CAACACAGTCATCTCCGCTGAT |
| JEV-G4-800_16_LEFT | ATGCTGCAGGTTTGGAACAGAG |
| JEV-G4-800_16_RIGHT | ACCTCTAGTCCTTCCACCTCTTC |

**Supplementary Table 5.** Details of JEV whole genome sequences generated from samples collected in 2021 to 2022 in Australia used for the phylogenetic analyses conducted for this study.

| **Sample Identifier** | **Collection Date** | **Host** | **Location** | **GenBank** |
| --- | --- | --- | --- | --- |
| 21-02409-0001 | 2021-03-10 | Human | NT_Tiwi_Islands | OM867669 |
| O-0883 | 2022-02 | Isolate | NSW_Murray | OP904182 |
| S46716 | 2022-05-11 | Mosquito | QLD_Wide_Bay_Burnett | OR965960 |
| 27003 | 2022-01-10 | Mosquito | NSW_Riverina | PV666440 |
| 22-00391-0002 | 2022-01-19 | Swine | NSW_Riverina | PV666441 |
| 22-00651-0005 | 2022-02-14 | Swine | VIC_Loddon_Mallee | PV666442 |
| 22-00691-0003 | 2022-02-15 | Swine | NSW_Murray | PV666443 |
| 22-00749-0005-05 | 2022-02-26 | Swine | VIC_Loddon_Mallee | PV666444 |
| 22-00766-0002 | 2022-02-28 | Swine | VIC_Hume | PV666445 |
| 22-00769-0012 | 2022-02-22 | Swine | NSW_Murray | PV666446 |
| 22-00799-0003-03 | 2022-02-27 | Swine | SA_Murray_Riverlands | PV666447 |
| 22-00819-0001 | 2022-02-26 | Swine | NSW_Murray | PV666448 |
| 22-00820-0015 | 2022-03-01 | Swine | NSW_Northern_Tablelands | PV666449 |
| 22-00824-0007 | 2021-04-07 | Swine | QLD_Northern | PV666450 |
| 22-00854-0009 | 2022-03-02 | Swine | VIC_Hume | PV666451 |
| 22-00855-0006 | 2022-03-02 | Swine | VIC_Loddon_Mallee | PV666452 |
| 22-00864-0013 | 2022-03-03 | Swine | VIC_Loddon_Mallee | PV666453 |
| 22-00867-0012 | 2022-02-27 | Swine | NSW_Central_West | PV666454 |
| 22-00874-0001 | 2022-01-20 | Swine | NSW_Murray | PV666455 |
| 22-00920-0004 | 2022-03-04 | Swine | VIC_Hume | PV666456 |
| 22-00924-0002 | 2022-03-06 | Swine | VIC_Grampians | PV666457 |
| 22-00993-0006 | 2022-03-05 | Swine | NSW_Riverina | PV666458 |
| 22-00994-0006 | 2022-03-05 | Swine | NSW_Riverina | PV666459 |
| 22-01027-0026 | 2022-03-04 | Mosquito | VIC_Loddon_Mallee | PV666460 |
| 22-01072-0008 | 2022-03-16 | Swine | VIC_Loddon_Mallee | PV666461 |
| 22-01079-0002 | 2022-03-16 | Swine | VIC_Hume | PV666462 |
| 22-01090-0004 | 2022-03-10 | Swine | NSW_Murray | PV666463 |
| 22-01093-0004 | 2022-03-17 | Swine | VIC_Hume | PV666464 |
| 22-01094-0005 | 2022-03-17 | Swine | VIC_Loddon_Mallee | PV666465 |
| 22-01094-0009 | 2022-03-17 | Swine | VIC_Loddon_Mallee | PV666466 |
| 22-01121-0002 | 2022-03-16 | Swine | VIC_Loddon_Mallee | PV666467 |
| 22-01152-0002-02 | 2022-03-17 | Swine | SA_Murray_Riverlands | PV666468 |
| 22-01156-0003 | 2022-03-21 | Swine | VIC_Loddon_Mallee | PV666469 |
| 22-01157-0006 | 2022-03-12 | Swine | QLD_Darling_Downs | PV666470 |
| 22-01158-0002 | 2022-03-17 | Swine | VIC_Loddon_Mallee | PV666471 |
| 22-01159-0001 | 2022-03-16 | Swine | VIC_Loddon_Mallee | PV666472 |
| 22-01160-0001 | 2022-03-17 | Swine | VIC_Loddon_Mallee | PV666473 |
| 22-01160-0002 | 2022-03-17 | Swine | VIC_Loddon_Mallee | PV666474 |
| 22-01163-0005-01 | 2022-03-18 | Swine | SA_Murray_Riverlands | PV666475 |
| 22-01168-0002 | 2022-03-22 | Swine | VIC_Loddon_Mallee | PV666476 |
| 22-01172-0003-02 | 2022-03-19 | Swine | SA_Murray_Riverlands | PV666477 |
| 22-01213-0004 | 2022-03-25 | Swine | VIC_Hume | PV666478 |
| 22-01214-0004 | 2022-03-25 | Swine | VIC_Loddon_Mallee | PV666479 |
| 22-01214-0006 | 2022-03-25 | Swine | VIC_Loddon_Mallee | PV666480 |
| 22-01225-0005-02 | 2022-03-22 | Swine | SA_Mid_North | PV666481 |
| 22-01231-0001 | 2022-03-24 | Swine | VIC_Gippsland | PV666482 |
| 22-01250-0001 | 2022-03-23 | Swine | NSW_Murray | PV666483 |
| 22-01261-0036 | 2022-02-15 | Mosquito | VIC_Loddon_Mallee | PV666484 |
| 22-01262-0009 | 2022-02-03 | Mosquito | VIC_Hume | PV666485 |
| 22-01262-0053 | 2022-02-01 | Mosquito | VIC_Hume | PV666486 |
| 22-01285-0006-03 | 2022-04-24 | Swine | SA_Mid_North | PV666487 |
| 22-01301-0002 | 2022-03-31 | Swine | VIC_Gippsland | PV666488 |
| 22-01301-0004 | 2022-03-31 | Swine | VIC_Gippsland | PV666489 |
| 22-01301-0005 | 2022-03-31 | Swine | VIC_Gippsland | PV666490 |
| 22-01307-0021 | 2022-01-25 | Mosquito | VIC_Loddon_Mallee | PV666491 |
| 22-01335-0027 | 2022-01-11 | Mosquito | VIC_Loddon_Mallee | PV666492 |
| 22-01379-0003 | 2022-04-07 | Swine | VIC_Loddon_Mallee | PV666493 |
| 22-01379-0007 | 2022-04-07 | Swine | VIC_Loddon_Mallee | PV666494 |
| 22-01405-0007-01 | 2022-04-01 | Swine | SA_Barossa | PV666495 |
| 22-01462-0001 | 2022-04-13 | Swine | VIC_Gippsland | PV666496 |
| 22-01462-0002 | 2022-04-13 | Swine | VIC_Gippsland | PV666497 |
| 22-01506-0001 | 2022-04-04 | Swine | VIC_Loddon_Mallee | PV666498 |
| 22-01506-0003 | 2022-04-04 | Swine | VIC_Loddon_Mallee | PV666499 |
| 22-01587-0005 | 2022-04-26 | Swine | VIC_Hume | PV666500 |
| 22-01587-0006 | 2022-04-26 | Swine | VIC_Hume | PV666501 |
| 22-01591-0016 | 2022-04-08 | Swine | QLD_Darling_Downs | PV666502 |
| 22-01595-0003 | 2022-04-06 | Swine | QLD_Wide_Bay_Burnett | PV666503 |
| 22-01596-0002 | 2022-04-08 | Swine | QLD_Wide_Bay_Burnett | PV666504 |
| 22-01597-0003 | 2022-04-08 | Swine | QLD_Wide_Bay_Burnett | PV666505 |
| 22-01936-0004 | 2022-04-29 | Swine | SA_Murray_Riverlands | PV666506 |
| 22-02018-0010 | 2022-04-26 | Swine | QLD_Darling_Downs | PV666507 |
| 22-02113-0001 | 2022-05-10 | Feral_pig | NT_Darwin | PV666508 |
| 22-02438-0016 | 2022-05-24 | Swine | SA_Barossa | PV666509 |
| 22-02644-0001 | 2022-04-25 | Feral_pig | NT_Tiwi_Islands | PV666510 |
| 22-02644-0002 | 2022-05-02 | Feral_pig | NT_West_Arnhem | PV666511 |
| 22-02644-0003 | 2022-05-02 | Feral_pig | NT_West_Arnhem | PV666512 |
| 22-02644-0006 | 2022-05-02 | Feral_pig | NT_West_Arnhem | PV666513 |
| 22-02644-0007 | 2022-05-03 | Feral_pig | NT_Darwin | PV666514 |
| 22-02644-0008 | 2022-05-03 | Feral_pig | NT_Darwin | PV666515 |
| 22-02644-0009 | 2022-05-04 | Feral_pig | NT_Darwin | PV666516 |
| 22-02644-0010 | 2022-05-04 | Feral_pig | NT_Darwin | PV666517 |
| 22-02644-0011 | 2022-05-05 | Feral_pig | NT_Darwin | PV666518 |
| 22-02644-0012 | 2022-05-05 | Feral_pig | NT_Darwin | PV666519 |
| 22-02644-0013 | 2022-05-05 | Feral_pig | NT_Darwin | PV666520 |
| 22-02644-0014 | 2022-05-06 | Feral_pig | NT_Darwin | PV666521 |
| 22-02644-0015 | 2022-05-06 | Feral_pig | NT_Darwin | PV666522 |
| 22-02644-0016 | 2022-05-06 | Feral_pig | NT_Darwin | PV666523 |
| 22-02644-0017 | 2022-05-06 | Feral_pig | NT_Darwin | PV666524 |
| 22-02644-0018 | 2022-05-06 | Feral_pig | NT_Darwin | PV666525 |
| 22-02644-0019 | 2022-05-07 | Feral_pig | NT_Darwin | PV666526 |
| 22-04049-0001 | 2022-01-17 | Mosquito | SA_Murray_Riverlands | PV666527 |
| EMAI01 | 2022-01-23 | Swine | NSW_Riverina | PV666528 |
| EMAI02 | 2022-01-25 | Swine | NSW_Murray | PV666529 |
| EMAI03 | 2022-02-02 | Swine | NSW_Murray | PV666530 |
| EMAI04 | 2022-02-10 | Swine | NSW_Central_West | PV666531 |
| EMAI05 | 2022-02-10 | Swine | NSW_Central_West | PV666532 |
| EMAI06 | 2022-02-14 | Swine | NSW_Murray | PV666533 |
| EMAI07 | 2022-02-17 | Swine | NSW_Riverina | PV666534 |
| EMAI09 | 2022-02-21 | Swine | NSW_Riverina | PV666535 |
| EMAI10 | 2022-02-21 | Swine | NSW_Riverina | PV666536 |
| EMAI11 | 2022-02-26 | Swine | NSW_Murray | PV666537 |
| EMAI12 | 2022-02-26 | Swine | NSW_Murray | PV666538 |
| EMAI13 | 2022-02-21 | Swine | NSW_Central_West | PV666539 |
| EMAI14 | 2022-02-21 | Swine | NSW_Central_West | PV666540 |
| EMAI15 | 2022-02-23 | Swine | QLD_Darling_Downs | PV666541 |
| EMAI17 | 2022-02-28 | Swine | NSW_Murray | PV666542 |
| EMAI18 | 2022-02-28 | Swine | NSW_Murray | PV666543 |
| EMAI19 | 2022-02-27 | Swine | NSW_Murray | PV666544 |
| EMAI21 | 2022-03-01 | Swine | NSW_Northern_Tablelands | PV666545 |
| EMAI22 | 2022-03-01 | Swine | NSW_Northern_Tablelands | PV666546 |
| EMAI24 | 2022-03-01 | Swine | NSW_Murray | PV666547 |
| EMAI25 | 2022-03-02 | Swine | NSW_Central_West | PV666548 |
| EMAI26 | 2022-03-02 | Swine | NSW_Central_West | PV666549 |
| EMAI27 | 2022-03-04 | Swine | NSW_Riverina | PV666550 |
| EMAI28 | 2022-03-04 | Swine | NSW_Riverina | PV666551 |
| EMAI29 | 2022-03-04 | Swine | NSW_Riverina | PV666552 |
| EMAI30 | 2022-03-04 | Swine | NSW_Riverina | PV666553 |
| EMAI31 | 2022-03-09 | Swine | NSW_Central_West | PV666554 |
| EMAI34 | 2022-03-10 | Swine | NSW_Murray | PV666555 |
| EMAI36 | 2022-03-15 | Swine | NSW_Murray | PV666556 |
| EMAI37 | 2022-03-15 | Swine | NSW_Murray | PV666557 |
| EMAI38 | 2022-03-15 | Swine | NSW_Murray | PV666558 |
| EMAI39 | 2022-03-15 | Swine | NSW_Central_Tablelands | PV666559 |
| EMAI40 | 2022-03-15 | Swine | NSW_Central_Tablelands | PV666560 |
| EMAI41 | 2022-03-14 | Swine | NSW_Riverina | PV666561 |
| EMAI42 | 2022-03-14 | Swine | NSW_Riverina | PV666562 |
| EMAI43 | 2022-03-14 | Swine | NSW_Murray | PV666563 |
| EMAI44 | 2022-03-14 | Swine | NSW_Murray | PV666564 |
| EMAI45 | 2022-03-18 | Swine | NSW_Riverina | PV666565 |
| EMAI47 | 2022-03-18 | Swine | NSW_Riverina | PV666566 |
| EMAI48 | 2022-03-18 | Swine | NSW_Riverina | PV666567 |
| EMAI51 | 2022-03-21 | Swine | NSW_Murray | PV666568 |
| EMAI52 | 2022-03-21 | Swine | NSW_Murray | PV666569 |
| EMAI53 | 2022-03-20 | Swine | NSW_Murray | PV666570 |
| EMAI54 | 2022-03-20 | Swine | NSW_Murray | PV666571 |
| EMAI56 | 2022-03-26 | Swine | NSW_Murray | PV666572 |
| EMAI57 | 2022-03-26 | Swine | NSW_Murray | PV666573 |
| JEV001 | 2022-02-16 | Human | NSW_Riverina | PV666574 |
| P22-00698-27 | 2022-02-22 | Swine | QLD_Darling_Downs | PV666575 |
| P22-00902-2 | 2022-03-11 | Swine | QLD_Wide_Bay_Burnett | PV666576 |
| P22-00902-7 | 2022-03-11 | Swine | QLD_Wide_Bay_Burnett | PV666577 |
| P22-00961-41 | 2022-03-15 | Swine | QLD_Darling_Downs | PV666578 |
| P22-01043-12 | 2022-03-21 | Swine | QLD_Darling_Downs | PV666579 |
| P22-01131-3 | 2022-03-25 | Swine | QLD_Wide_Bay_Burnett | PV666580 |
| P22-01131-11 | 2022-03-25 | Swine | QLD_Wide_Bay_Burnett | PV666581 |
| P22-01131-31 | 2022-03-25 | Swine | QLD_Wide_Bay_Burnett | PV666582 |
| P22-01131-54 | 2022-03-25 | Swine | QLD_Wide_Bay_Burnett | PV666583 |
| P22-01131-57 | 2022-03-25 | Swine | QLD_Wide_Bay_Burnett | PV666584 |
| P22-01333-3 | 2022-04-08 | Swine | QLD_Wide_Bay_Burnett | PV666585 |
| P22-01333-4 | 2022-04-08 | Swine | QLD_Wide_Bay_Burnett | PV666586 |
| P22-01335-2 | 2022-04-08 | Swine | QLD_Wide_Bay_Burnett | PV666587 |
| P22-01336-2 | 2022-04-08 | Swine | QLD_Wide_Bay_Burnett | PV666588 |
| P22-01336-10 | 2022-04-08 | Swine | QLD_Wide_Bay_Burnett | PV666589 |
| P22-01348-11 | 2022-04-08 | Swine | QLD_Darling_Downs | PV666590 |
| P22-01348-19 | 2022-04-08 | Swine | QLD_Darling_Downs | PV666591 |
| P22-01348-46 | 2022-04-08 | Swine | QLD_Darling_Downs | PV666592 |
| P22-01350-9 | 2022-04-08 | Swine | QLD_Darling_Downs | PV666593 |
| P22-01352-18 | 2022-04-08 | Swine | QLD_Wide_Bay_Burnett | PV666594 |
| P22-01590-19 | 2022-04-26 | Swine | QLD_Darling_Downs | PV666595 |
| P22-01590-30 | 2022-04-26 | Swine | QLD_Darling_Downs | PV666596 |
| P22-01629-3 | 2022-04-29 | Swine | QLD_Wide_Bay_Burnett | PV666597 |
| P22-01661-12 | 2022-04-29 | Swine | QLD_Wide_Bay_Burnett | PV666598 |
| P22-01661-20 | 2022-04-29 | Swine | QLD_Wide_Bay_Burnett | PV666599 |
| P22-02131-92 | 2022-05-30 | Feral_pig | QLD_Far_North | PV666600 |
| P22-02436-59 | 2022-06-28 | Swine | QLD_Darling_Downs | PV666601 |
| P22-02806-13 | 2022-07-18 | Swine | QLD_Wide_Bay_Burnett | PV666602 |
| VIDRL03 | 2022-03 | Human | VIC_Unknown | PV666603 |

**References**

Pyke, A.T. *et al.* (2024) ‘First Isolation of Japanese Encephalitis Virus Genotype IV from Mosquitoes in Australia’, *Vector-Borne and Zoonotic Diseases*, 24(7), pp. 439-442. Available at: https//doi.org.10.1089/vbz.2024.0017
